# Supplementary material for: Preparation of Co-Amorphous Levofloxacin Systems for Pulmonary Application
Source: MDPI journal article supplement (doi:10.3390/pharmaceutics15061574), 2023-05-23
Supplement: s1 [file s1]

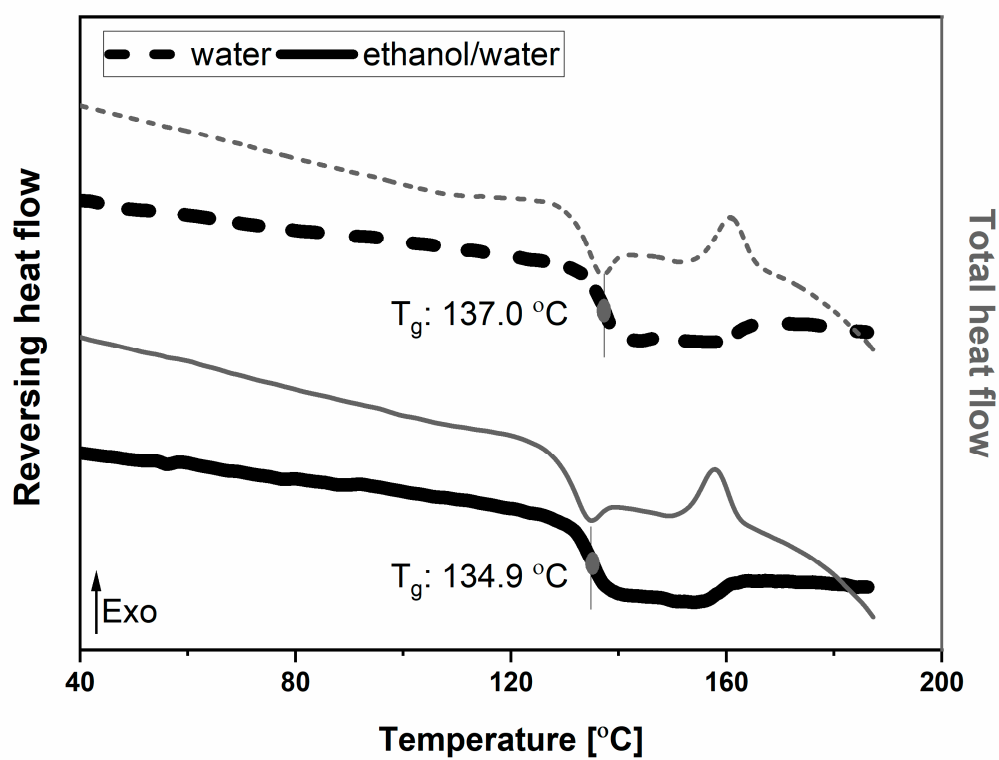

Figure S1. DSC thermogram originating from the second heating in the heat-cool-heat cycle

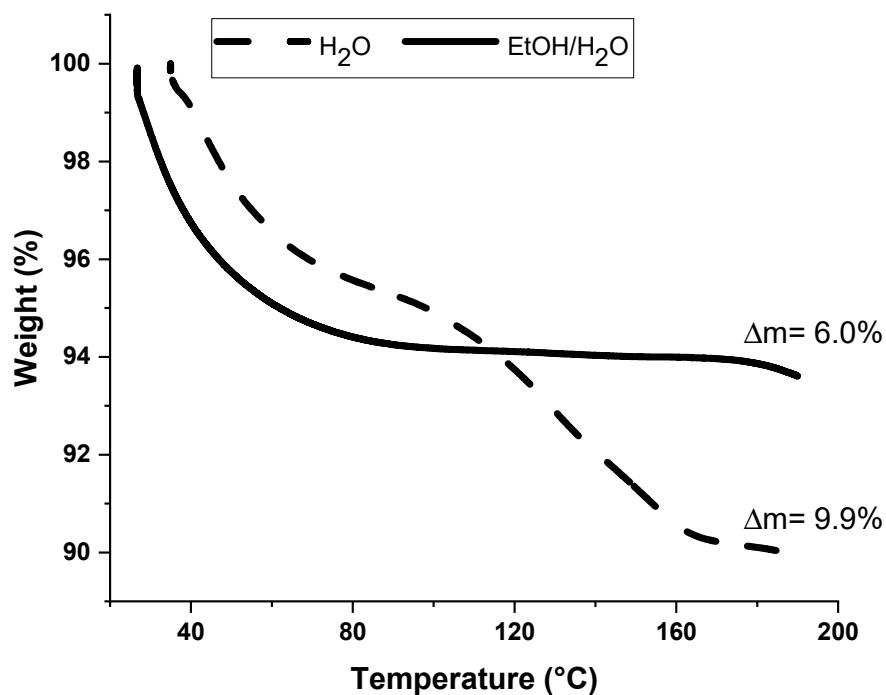

**Figure S2.** Thermogravimetric analysis of spray-dried material from H<sub>2</sub>O and from EtOH/H<sub>2</sub>O mixture (DoE center point)

**Table S1.** Mass recovery from different NGI stages

|                 | H <sub>2</sub> O | Center 1 | Center 2 | Center 3 | DoE 1 | DoE 2 | DoE 3 | DoE 3.5 | DoE 4.5 |
|-----------------|------------------|----------|----------|----------|-------|-------|-------|---------|---------|
| Presep + throat | 15757            | 11838    | 14627    | 16279    | 15596 | 8310  | 13683 | 16246   | 19808   |
| 1               | 1536             | 1344     | 1005     | 1124     | 1369  | 694   | 1201  | 1713    | 2265    |
| 2               | 1390             | 3489     | 4149     | 2937     | 3742  | 1685  | 2633  | 3506    | 6335    |
| 3               | 1372             | 7092     | 5915     | 7086     | 6588  | 4867  | 6683  | 7286    | 10103   |
| 4               | 948              | 5805     | 4939     | 6580     | 5678  | 5187  | 6856  | 3123    | 7293    |
| 5               | 662              | 2023     | 1652     | 2240     | 1942  | 1662  | 2165  | 834     | 2211    |
| 6               | 298              | 319      | 298      | 336      | 423   | 316   | 294   | 613     | 367     |
| 7               | 233              | 237      | 43       | 151      | 345   | 246   | 191   | 402     | 283     |
| MOC             | 65               | 123      | 13       | 75       | 156   | 128   | 116   | 141     | 134     |
